# Supplementary material for: YAP Regulates S-Phase Entry in Endothelial Cells
Source: PubMed Central journal article supplement (PMC4312014; doi:10.1371/journal.pone.0117522), 2015-01-30

Supp. Fig. 4 (see also Fig. 2)

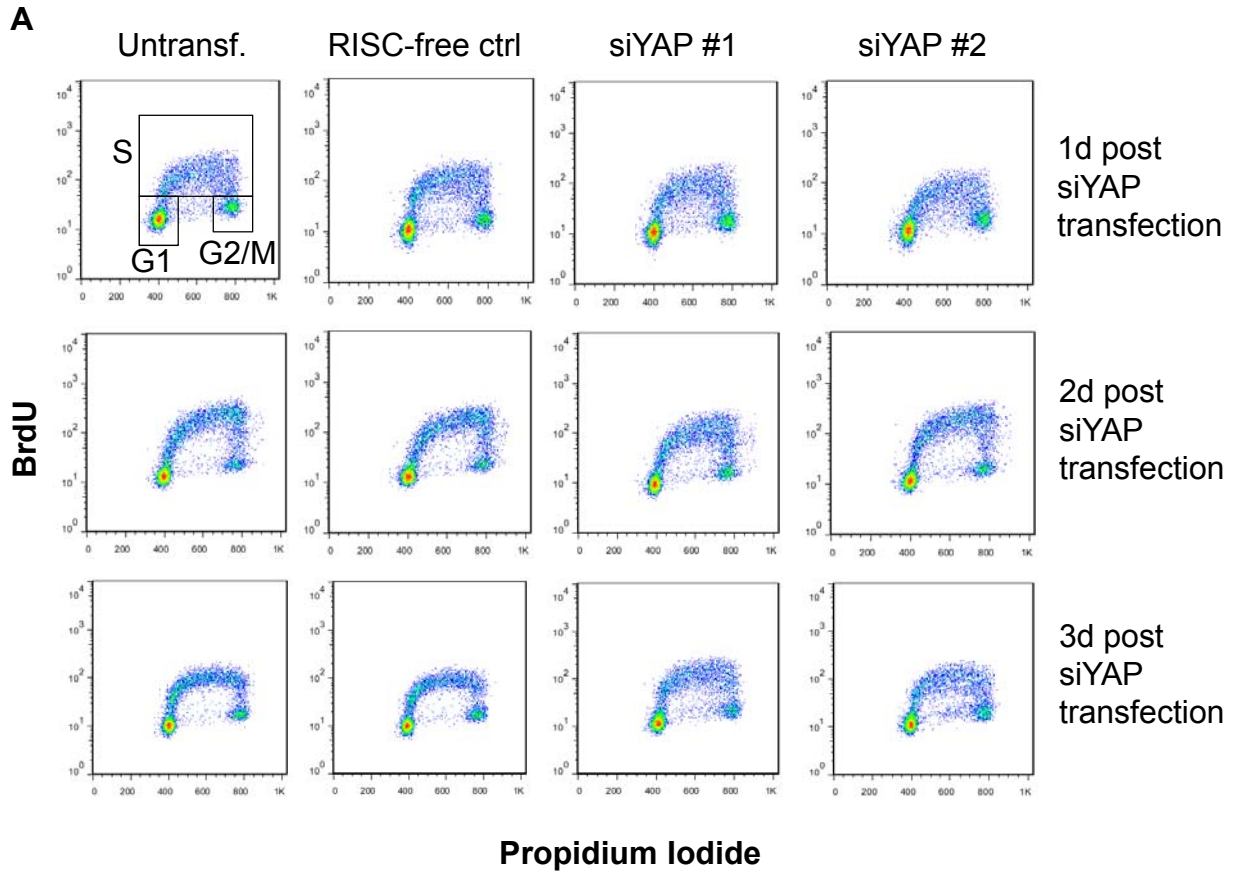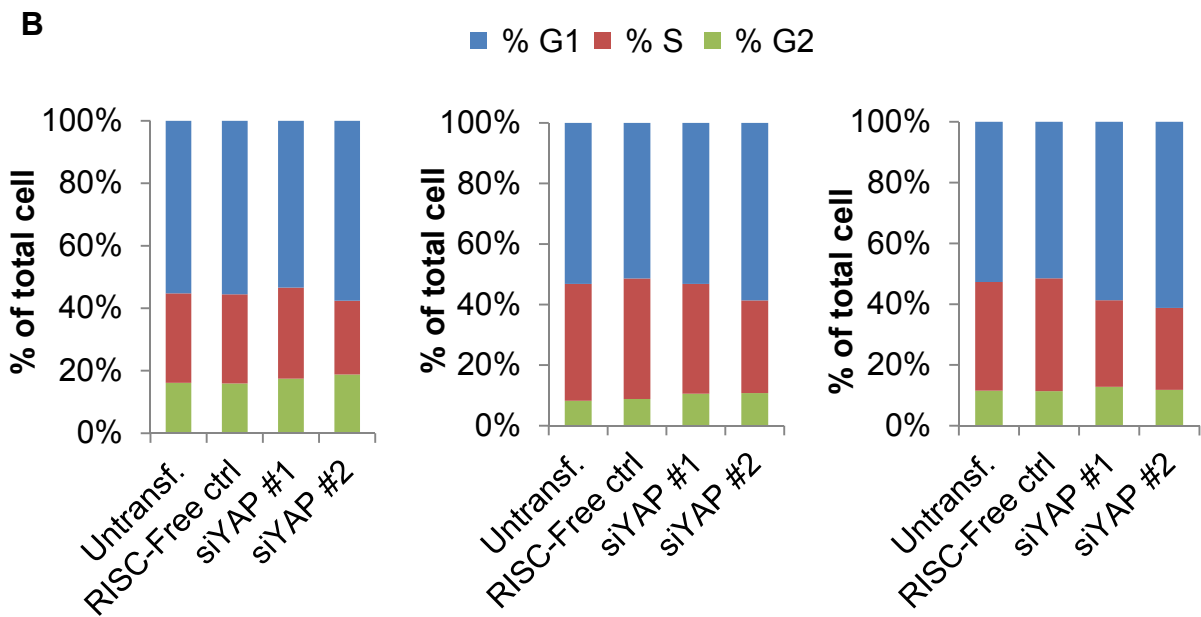

Supplement: pone.0117522.s004.pdf [file pone.0117522.s004.pdf]
